# Supplementary material for: 1H NMR Based Metabolomics in Human Sepsis and Healthy Serum
Source: MDPI journal article supplement (doi:10.3390/metabo10020070), 2020-02-15
Supplement: s1 [file s1]

**Table S1.** Case processing summary. NA: value was rejected by automatic sample and measurement quality control; TAG: value cannot be quantified due to detected irregularity in sample. Rejected metabolites are marked in red font. Please note that albumin was rejected due to the quantification uncertainties.

|                   |          | Valid cases | Missing cases | TAG | NA |
|-------------------|----------|-------------|---------------|-----|----|
| Metabolite        | Group    | N           | N             | N   | N  |
| Glucose           | Patients | 44          | 0             | 0   | 0  |
|                   | Controls | 14          | 0             | 0   | 0  |
| Lactate           | Patients | 44          | 0             | 0   | 0  |
|                   | Controls | 14          | 0             | 0   | 0  |
| Pyruvate          | Patients | 6           | 38            | 36  | 2  |
|                   | Controls | 10          | 4             | 0   | 4  |
| Citrate           | Patients | 41          | 3             | 3   | 0  |
|                   | Controls | 44          | 0             | 0   | 0  |
| Glycerol          | Patients | 17          | 27            | 9   | 18 |
|                   | Controls | 6           | 8             | 8   | 0  |
| Alanine           | Patients | 44          | 0             | 0   | 0  |
|                   | Controls | 14          | 0             | 0   | 0  |
| Glutamine         | Patients | 8           | 36            | 36  | 0  |
|                   | Controls | 14          | 0             | 0   | 0  |
| Glycine           | Patients | 44          | 0             | 0   | 0  |
|                   | Controls | 14          | 0             | 0   | 0  |
| Histadine         | Patients | 44          | 0             | 0   | 0  |
|                   | Controls | 14          | 0             | 0   | 0  |
| Isoleucine        | Patients | 44          | 0             | 0   | 0  |
|                   | Controls | 14          | 0             | 0   | 0  |
| Leucine           | Patients | 12          | 32            | 32  | 0  |
|                   | Controls | 14          | 0             | 0   | 0  |
| Valine            | Patients | 44          | 0             | 0   | 0  |
|                   | Controls | 14          | 0             | 0   | 0  |
| Phenylalanine     | Patients | 12          | 32            | 32  | 0  |
|                   | Controls | 14          | 0             | 0   | 0  |
| Tyrosine          | Patients | 44          | 0             | 0   | 0  |
|                   | Controls | 14          | 0             | 0   | 0  |
| Acetate           | Patients | 10          | 34            | 34  | 0  |
|                   | Controls | 14          | 0             | 0   | 0  |
| Acetoacetate      | Patients | 12          | 32            | 32  | 0  |
|                   | Controls | 14          | 0             | 0   | 0  |
| 3-hydroxybutyrate | Patients | 44          | 0             | 0   | 0  |
|                   | Controls | 14          | 0             | 0   | 0  |
| Creatinine        | Patients | 29          | 15            | 15  | 0  |
|                   | Controls | 14          | 0             | 0   | 0  |
| Albumin           | Patients | 44          | 0             | 0   | 0  |
|                   | Controls | 14          | 0             | 0   | 0  |

|                         |          |    |   |   |   |
|-------------------------|----------|----|---|---|---|
| Glycoprotein<br>acetyls | Patients | 44 | 0 | 0 | 0 |
|                         | Controls | 14 | 0 | 0 | 0 |
